# Supplementary material
Source: publisher figshare collection journal article supplement (https://diabetesjournals.figshare.com/articles/dataset/_/24498310)

A. Mouse treatment

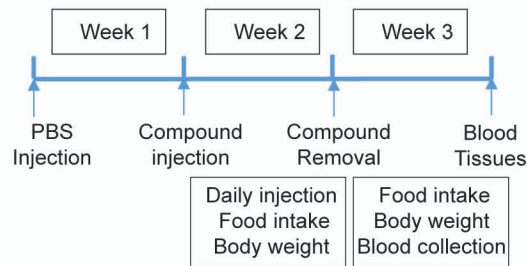

B. Food intake

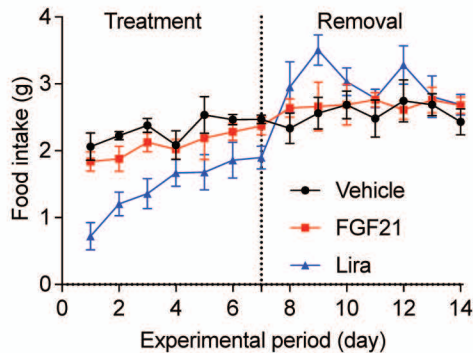

C. Food accumulation

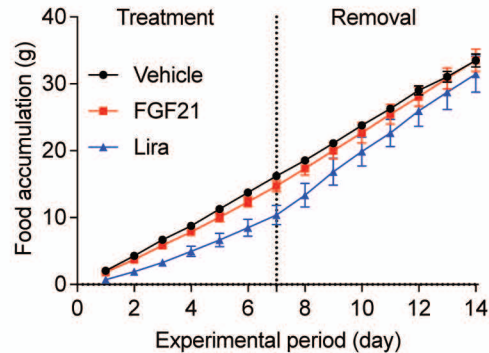

D. Weight loss

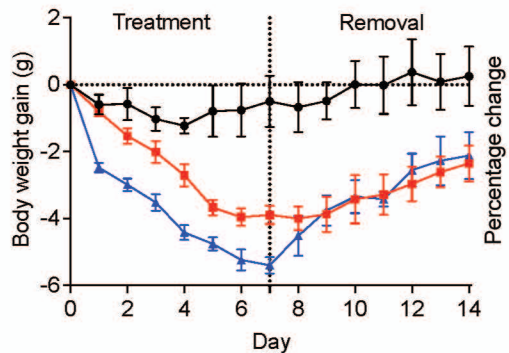

E. Change of leptin

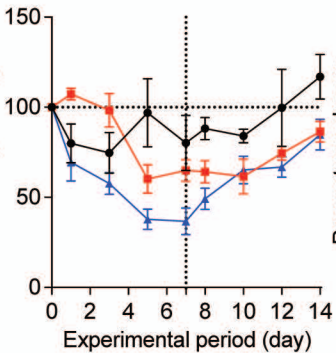

F. Change of adiponectin

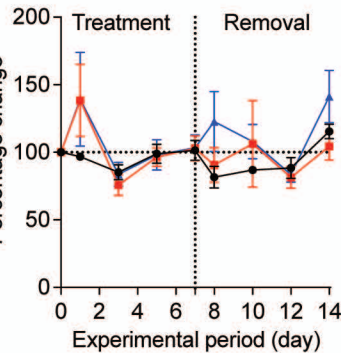

G. Change of insulin

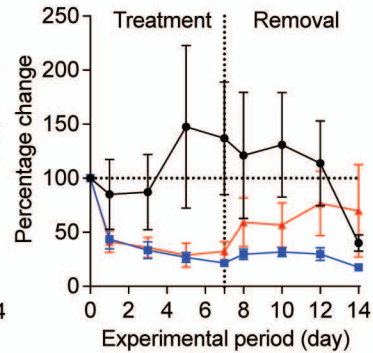

Supplement: Supplementary file 1 [file 1]
