# Supplementary material
Source: publisher figshare collection journal article supplement (https://diabetesjournals.figshare.com/articles/dataset/_/24498310)

A. Food intake

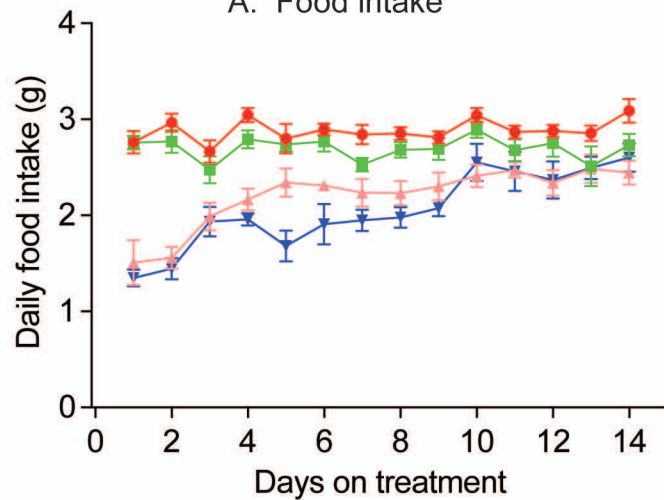

B. Food accumulation

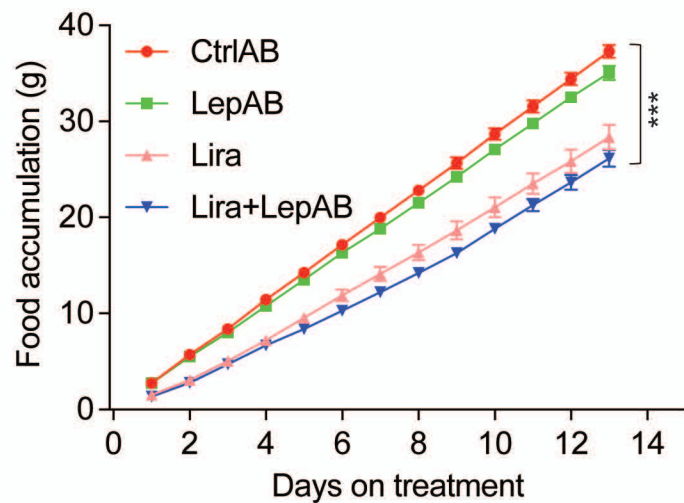

C. Body weight

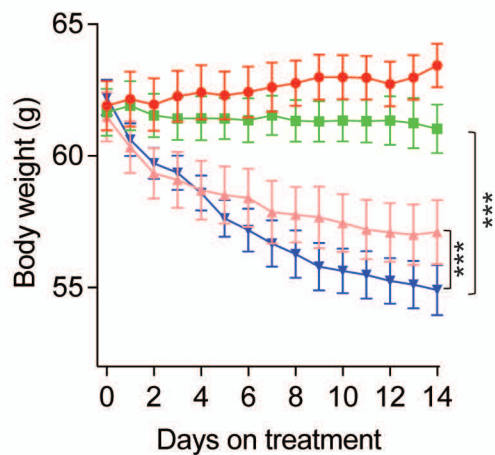

D. Weight loss

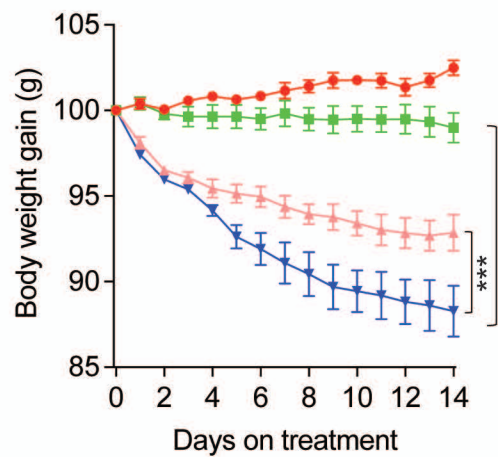

E. Weight loss

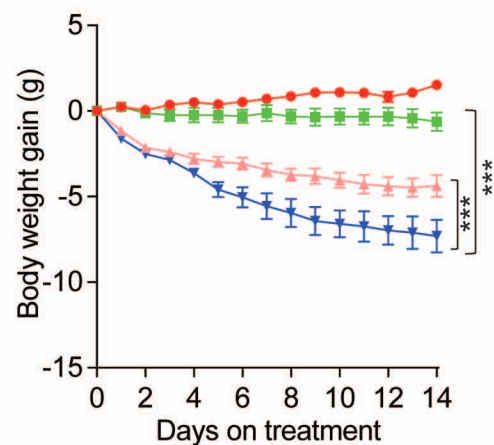

Supplement: Supplementary file 2 [file 1]
